# Supplementary material
Source: publisher site journal article supplement (https://natureconservation.pensoft.net/article/24856/download/suppl/33/)
Supplement: Supplementary file 1

**Supplementary Table 3.** The abundance of isopod (Isopoda) and millipede (Diplopoda) species found in semi-natural grasslands (G1–G6) and cereal fields (C1–C6). NA indicates the destroyed pitfall traps.

|  |  | **G1** | | | | **G2** | | | | **G3** | | | | **G4** | | | | **G5** | | | | **G6** | | | |
| --- | --- | --- | --- | --- | --- | --- | --- | --- | --- | --- | --- | --- | --- | --- | --- | --- | --- | --- | --- | --- | --- | --- | --- | --- | --- |
|  |  | **1** | **2** | **3** | **4** | **1** | **2** | **3** | **4** | **1** | **2** | **3** | **4** | **1** | **2** | **3** | **4** | **1** | **2** | **3** | **4** | **1** | **2** | **3** | **4** |
| **Isopoda** | *Armadillidium vulgare* | 0 | 0 | 0 | 0 | 1 | 12 | 28 | 37 | 56 | 76 | 276 | 31 | 14 | 16 | 18 | 26 | 1 | 0 | 0 | 1 | 1 | 4 | 1 | 3 |
| *Trachelipus rathkii* | 0 | 1 | 1 | 0 | 0 | 0 | 3 | 0 | 3 | 0 | 0 | 1 | 2 | 3 | 10 | 18 | 0 | 0 | 0 | 0 | 0 | 0 | 0 | 1 |
| *Trachelipus nodulosus* | 0 | 0 | 0 | 0 | 0 | 0 | 0 | 0 | 0 | 0 | 0 | 0 | 0 | 0 | 0 | 0 | 0 | 0 | 0 | 0 | 0 | 0 | 0 | 0 |
| *Porcellionides pruinosus* | 0 | 0 | 0 | 0 | 0 | 0 | 0 | 0 | 0 | 0 | 0 | 0 | 0 | 0 | 0 | 0 | 0 | 0 | 0 | 0 | 0 | 0 | 0 | 0 |
| **Diplopoda** | *Brachydesmus superus* | 0 | 0 | 0 | 0 | 0 | 0 | 0 | 0 | 0 | 0 | 0 | 0 | 0 | 0 | 0 | 0 | 0 | 0 | 0 | 0 | 0 | 0 | 0 | 0 |
| *Brachyiulus bagnalli* | 0 | 1 | 4 | 1 | 0 | 0 | 0 | 0 | 0 | 0 | 0 | 0 | 0 | 0 | 0 | 0 | 0 | 0 | 0 | 0 | 0 | 0 | 0 | 0 |
| *Julus terrestris* | 76 | 83 | 66 | 58 | 0 | 0 | 0 | 0 | 0 | 0 | 0 | 0 | 9 | 4 | 19 | 23 | 0 | 0 | 0 | 0 | 0 | 0 | 0 | 0 |
| *Megaphyllum unilineatum* | 0 | 0 | 0 | 0 | 0 | 1 | 0 | 0 | 2 | 1 | 8 | 7 | 2 | 1 | 4 | 6 | 0 | 0 | 0 | 3 | 0 | 0 | 0 | 0 |
|  |  |  |  |  |  |  |  |  |  |  |  |  |  |  |  |  |  |  |  |  |  |  |  |  |  |
|  |  | **C1** | | | | **C2** | | | | **C3** | | | | **C4** | | | | **C5** | | | | **C6** | | | |
|  |  | **1** | **2** | **3** | **4** | **1** | **2** | **3** | **4** | **1** | **2** | **3** | **4** | **1** | **2** | **3** | **4** | **1** | **2** | **3** | **4** | **1** | **2** | **3** | **4** |
| **Isopoda** | *Armadillidium vulgare* | 0 | 0 | 0 | NA | 0 | 0 | 0 | 0 | 0 | 0 | 0 | 0 | 0 | 3 | 0 | 0 | 0 | 0 | 0 | 0 | 0 | 0 | 0 | 0 |
| *Trachelipus rathkii* | 0 | 0 | 0 | NA | 0 | 0 | 0 | 0 | 0 | 0 | 0 | 0 | 0 | 0 | 1 | 0 | 0 | 0 | 0 | 0 | 0 | 0 | 0 | 0 |
| *Trachelipus nodulosus* | 0 | 0 | 0 | NA | 0 | 0 | 0 | 0 | 0 | 0 | 0 | 0 | 0 | 0 | 0 | 0 | 0 | 0 | 0 | 0 | 0 | 0 | 0 | 0 |
| *Porcellionides pruinosus* | 0 | 0 | 0 | NA | 0 | 0 | 0 | 0 | 0 | 0 | 0 | 0 | 0 | 0 | 0 | 0 | 0 | 0 | 0 | 0 | 0 | 0 | 0 | 0 |
| **Diplopoda** | *Brachydesmus superus* | 0 | 0 | 0 | NA | 2 | 1 | 0 | 0 | 0 | 0 | 0 | 0 | 0 | 28 | 11 | 0 | 0 | 0 | 0 | 0 | 0 | 0 | 0 | 0 |
| *Brachyiulus bagnalli* | 16 | 19 | 8 | NA | 9 | 4 | 9 | 0 | 7 | 3 | 0 | 0 | 0 | 15 | 8 | 0 | 11 | 0 | 1 | 1 | 0 | 1 | 0 | 1 |
| *Julus terrestris* | 0 | 0 | 0 | NA | 0 | 0 | 0 | 0 | 0 | 0 | 0 | 0 | 0 | 3 | 0 | 0 | 0 | 0 | 0 | 0 | 0 | 0 | 0 | 0 |
| *Megaphyllum unilineatum* | 0 | 1 | 0 | NA | 0 | 2 | 0 | 0 | 0 | 0 | 0 | 0 | 0 | 0 | 0 | 0 | 0 | 0 | 0 | 0 | 0 | 1 | 0 | 0 |
